# Supplementary material
Source: publisher figshare collection journal article supplement (https://gsapubs.figshare.com/ndownloader/files/22151346)
Supplement: Supplementary file 1 [file 22151346]

PROJCS["WGS_84_World_Mercator",GEOGCS["GCS_WGS_1984",DATUM["D_WGS84",SPHEROID["WGS84",6378137,298.257223563]],PRIMEM["Greenwich",0],UNIT["Degree",0.017453292519943295]],PROJECTION["Mercator"],PARAMETER["central_meridian",0],PARAMETER["standard_parallel_1",0],PARAMETER["false_easting",0],PARAMETER["false_northing",0],UNIT["Meter",1]]
